# Supplementary material
Source: ML conference proceedings conference paper supplement (https://aclanthology.org/D16-1173)
Supplement: Attachment [file supp-Deep Neural Networks with Massive Learned Knowledge.pdf › supp-Deep Neural Networks with Massive Learned Knowledge.pdf]

---

# Deep Neural Networks with Massive Learned Knowledge: Supplementary Material

---

## A Sentiment Classification

### A.1 Transition matrices

$$\begin{aligned} M_{r=\text{consistent}, y=0} &= \begin{bmatrix} 1 & 0 \\ 0 & 1 \end{bmatrix}, & M_{r=\text{contrastive}, y=0} &= \begin{bmatrix} 0 & 0 \\ 1 & 0 \end{bmatrix}, & M_{r=\text{concessive}, y=0} &= \begin{bmatrix} 0 & 1 \\ 0 & 0 \end{bmatrix}, \\ M_{r=\text{consistent}, y=1} &= \begin{bmatrix} 1 & 0 \\ 0 & 1 \end{bmatrix}, & M_{r=\text{contrastive}, y=1} &= \begin{bmatrix} 0 & 1 \\ 0 & 0 \end{bmatrix}, & M_{r=\text{concessive}, y=1} &= \begin{bmatrix} 0 & 0 \\ 1 & 0 \end{bmatrix}. \end{aligned}$$

In practice we add a small number  $\epsilon = 0.01$  to the matrices for smoothing.

### A.2 Architectures of the clause relation and sentiment networks

The clause sentiment network has the exact same architecture as the base network [Kim, 2014], and the discourse relation network first extracts representations of two input clauses individually using the same convolutional layer architecture, and concatenates the features before feeding into a fully-connected layer. For efficiency we tie the convolutional parameters across all the networks to share the representations, while leaving only the fully-connected layer parameters to be learned separately.

### A.3 Conjunction words

- *Consistent*: as well as; and; because; since; similarly; likewise; also; moreover; furthermore; so; therefore; consequently; hence; thus; meanwhile; in particular; in addition; namely; for example; for instance; then; as a result; besides; in other words; above all
- *Contrastive*: but; however; in contrast; whereas; on the contrary; instead; on the other hand
- *Concessive*: though; although; despite; in spite of; even though; even if; even as

### A.4 Negation and word polarity lexicons

We use Bing Lius Opinion Lexicon <sup>1</sup> for word polarity, which contains around 6,800 polarity-carrying words.

We use the LIWC <sup>2</sup> lexicon of “negate” category for negation words, which includes around 60 words.

## References

[Kim, 2014] Kim, Y. (2014). Convolutional neural networks for sentence classification. *Proc. of EMNLP*.

---

<sup>1</sup><https://www.cs.uic.edu/liub/FBS/sentiment-analysis.html#lexicon>

<sup>2</sup><http://liwc.wpengine.com>
